# Supplementary material for: ATX-101, a Peptide Targeting PCNA, Has Antitumor Efficacy Alone or in Combination with Radiotherapy in Murine Models of Human Glioblastoma
Source: MDPI journal article supplement (doi:10.3390/cancers14020289), 2022-01-07
Supplement: s1 [file s1]

# ATX-101, a Peptide Targeting PCNA, Has Antitumor Efficacy Alone or in Combination with Radiotherapy in Murine Models of Human Glioblastoma

GRAVINA et al, 2021.

## Supplementary material

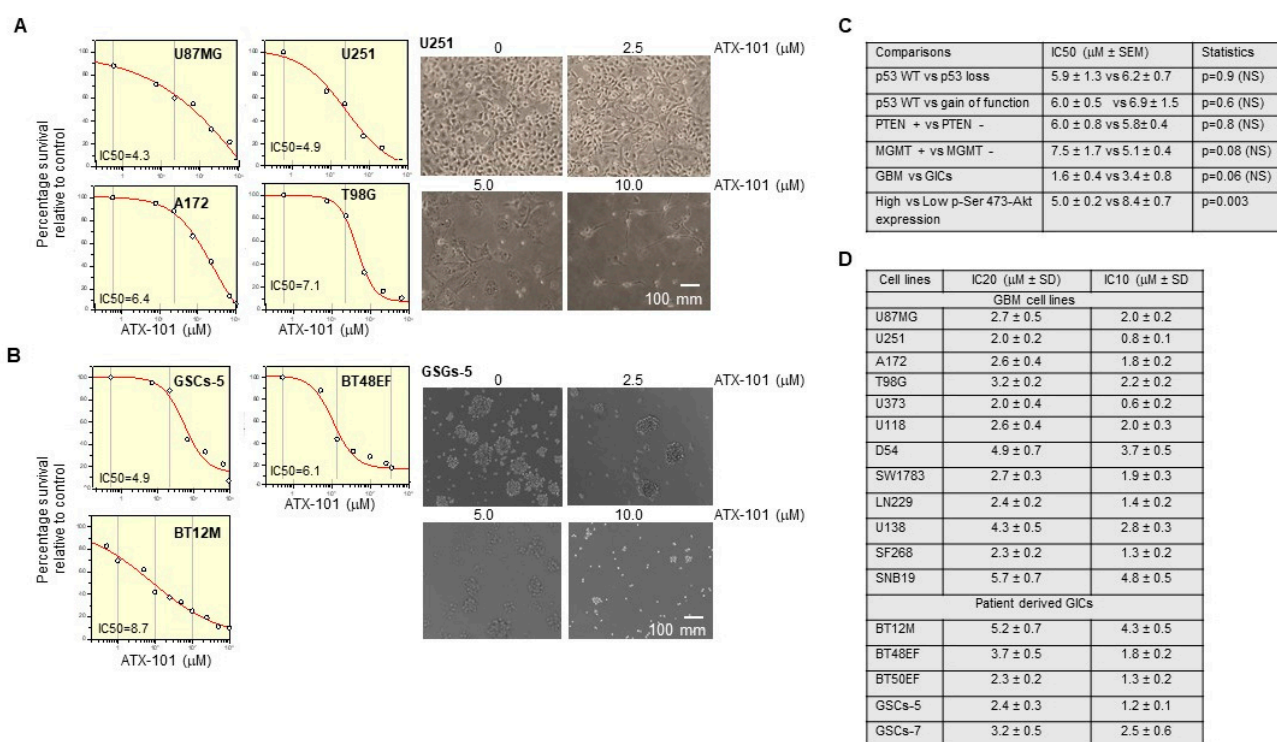

**Figure S1. Cell death induced by ATX-101 is independent of P53, PTEN and MGMT status in glioblastoma cell lines.** (A) Representative inhibition curves for ATX-101 treatment of U87MG, U251, A172 and T98G GMB cell lines (left panel). Representative images from U251 cell culture treated with different doses of ATX-101 (right panel). (B) Representative inhibition curves for ATX-101 treatment of the GICs GSCs-5, BT48EF and BT12M. Morphological appearance of GSCs-5 cultures treated with different doses of ATX-101 (right panel) (C) Comparisons between p53, PTEN, MGMT and p-Ser 473 Akt expression levels/status and IC50 values. Comparisons between IC50 values of GBM vs GIC cell lines. (D) IC20 and IC10 values calculated from survival curves. NS= not significant.

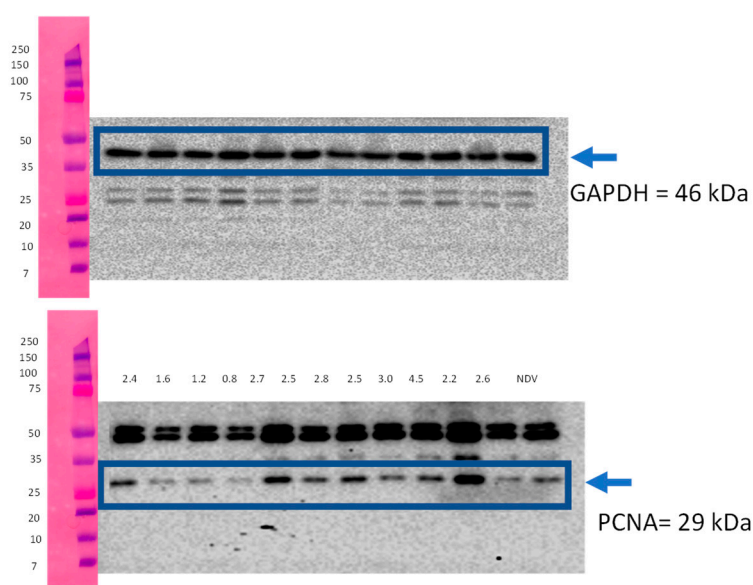

**Figure S2.** Uncropped Western blots shown in Figure 1C. For detailed description see figure legend in main manuscript.

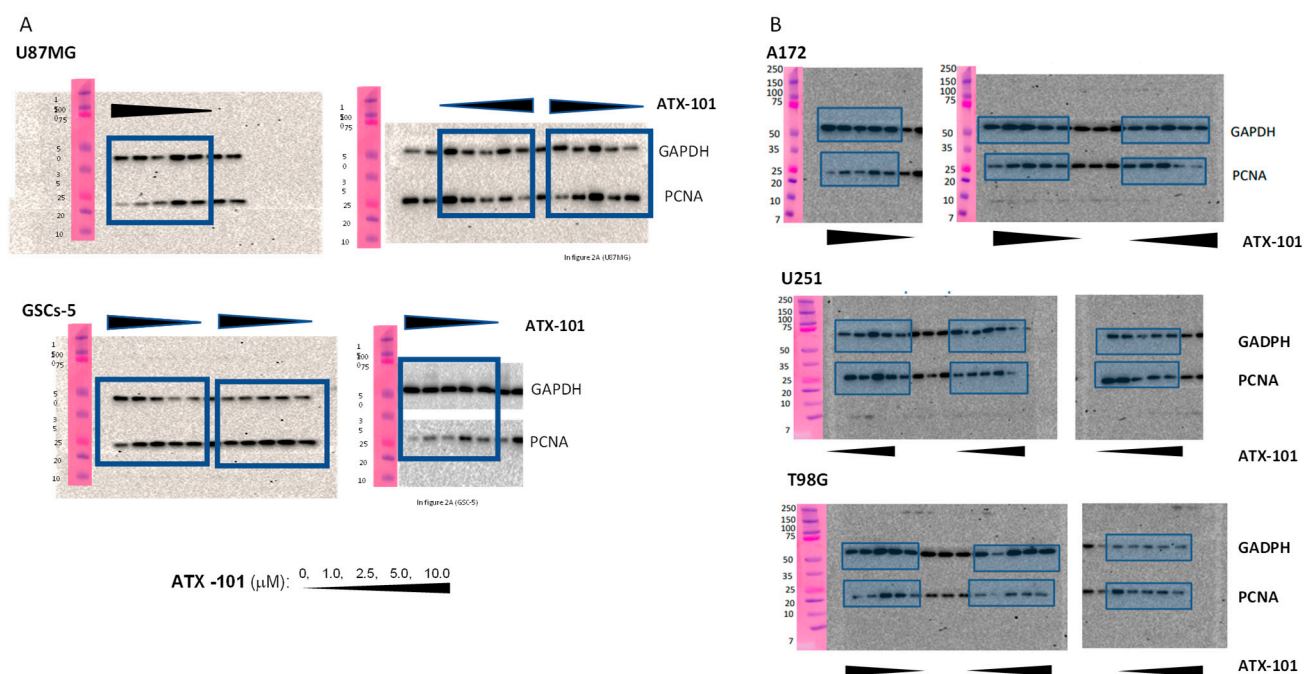

**Figure S3.** Uncropped Western blots shown in Figure 2A and B. For detailed description see figure legend in main manuscript.

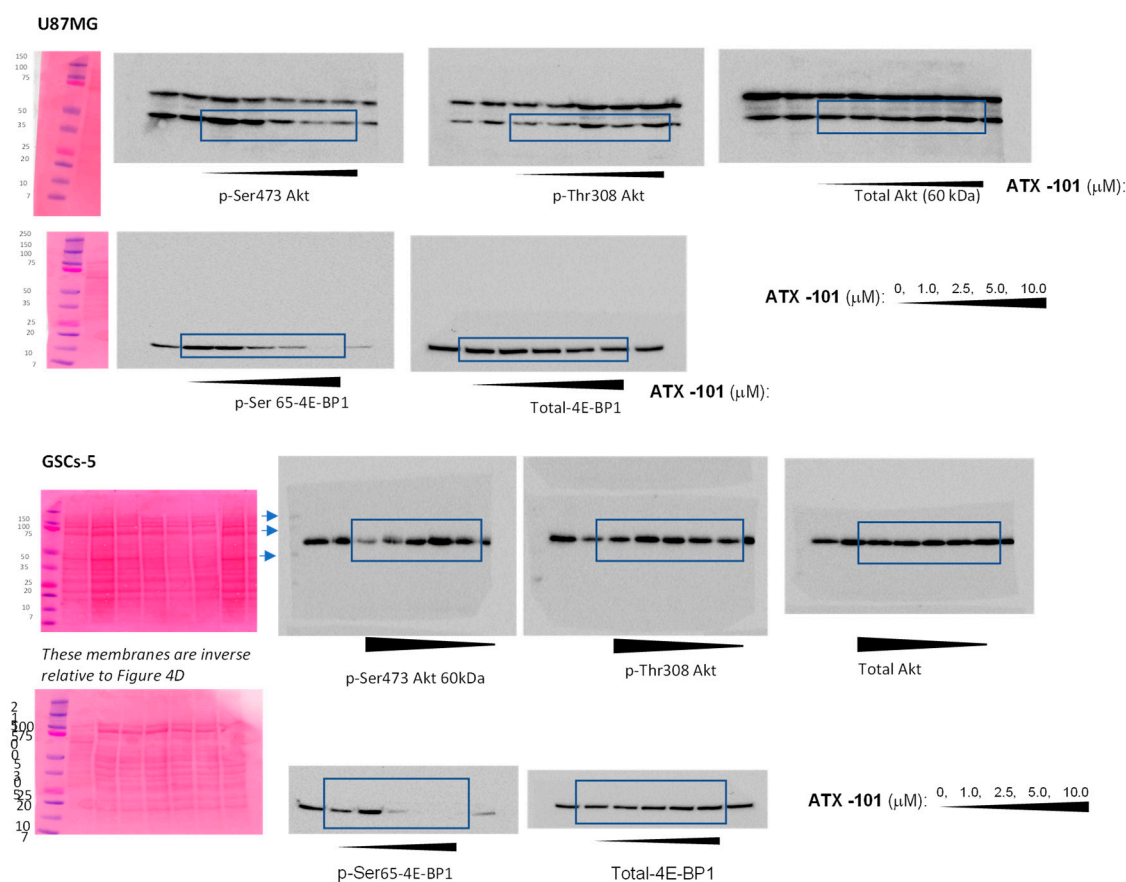

**Figure S4.** Uncropped Western blots shown in Figure 4D. For detailed description see figure legend in main manuscript.

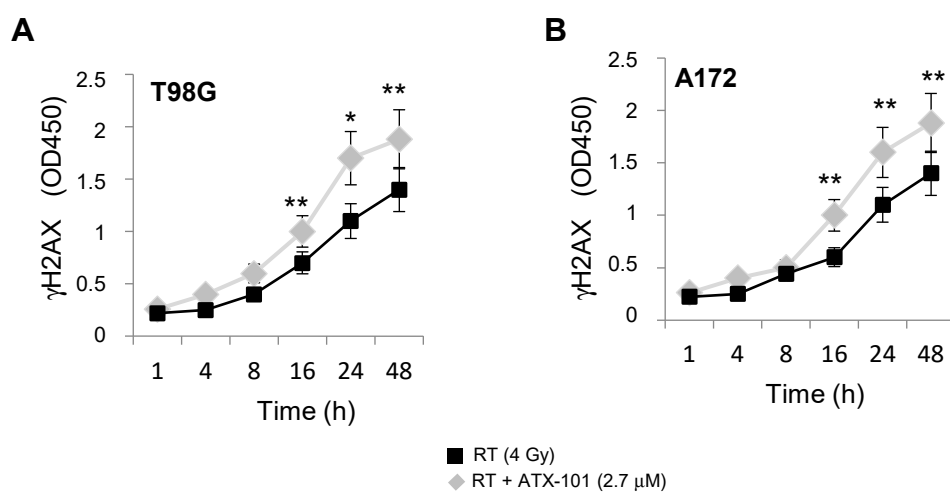

**Figure S5.** ATX-101 increases the levels of  $\gamma$ H2AX induced by RT. ELISA detection for  $\gamma$ H2AX in (A) T98G and (B) A172 glioma cell lines treated with ATX-101 (2.7  $\mu$ M) and RT (4 Gy) for 1- 48 h. Mean values of data from 3 cell extracts analysed in triplicates (total 9 determinations)  $\pm$  SD are shown. \* $p < 0.05$ , \*\*  $p < 0.01$ .

D

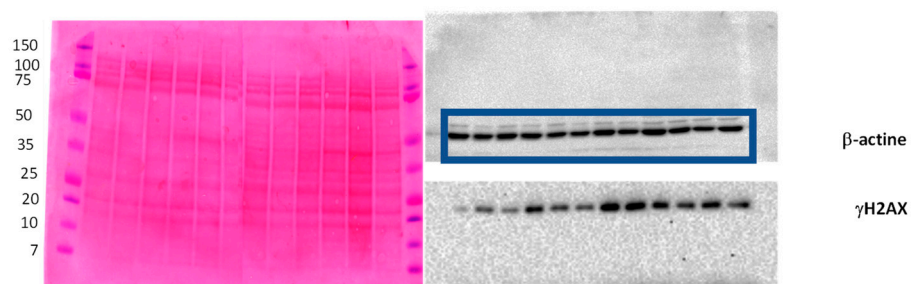

F

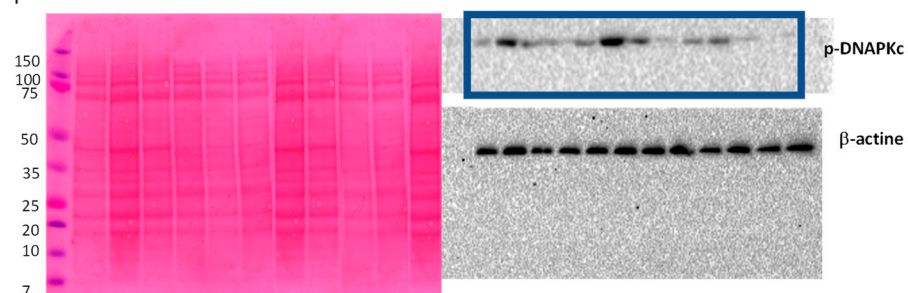

**Figure S6.** Uncropped Western blots shown in Figure 6D and F. For detailed description see figure legend in main manuscript.

**Table S1.** Characterization of GBM cell lines used.

| Cell line | MGMT               | TMZ | PTEN         | p53         | p-Ser 373-Akt | RT         |
|-----------|--------------------|-----|--------------|-------------|---------------|------------|
| U87MG     | Methylated (-)     | S   | PTEN/mutated | p53 (+ WT)  | High          | S          |
| U251      | Methylated (-)     | S   | PTEN/null    | p53/mutated | High          | S          |
| T98G      | Non-methylated (+) | R   | PTEN/null    | p53/mutated | High          | Moderately |
| A172      | Methylated (-)     | S   | PTEN (+WT)   | p53 (+WT)   | Low           | Moderately |
| D54       | Methylated (-)     | S   | PTEN (+WT)   | p53 (+WT)   | Low           | R          |
| SW1783    | Methylated (-)     | S   | PTEN (+WT)   | p53 (+WT)   | Low           | R          |
| U118      | Non-methylated (+) | R   | PTEN/null    | p53 (+WT)   | High          | R          |
| U373      | Methylated (-)     | S   | PTEN/null    | p53/mutated | High          | S          |
| SNB19     | Non-methylated (+) | R   | PTEN mutated | p53 (+WT)   | High          | Moderately |
| L229      | Methylated (-)     | S   | PTEN (+WT)   | p53/mutated | Low           | S          |
| SF268     | Non-methylated (+) | R   | PTEN/mutated | p53/mutated | High          | Moderately |
| U138      | Non-methylated (+) | R   | PTEN (+WT)   | p53/mutated | low           | R          |

**Table S2.** Weights of mice and tumours in the subcutaneous xenograft model.

Data shown in Figure 7B.

| Cells, Treatments   | Weight of mice<br>(mean $\pm$ SEM) | Tumour weight<br>(mean $\pm$ SEM) |
|---------------------|------------------------------------|-----------------------------------|
| U87MG, Vehicle      | 25.0 $\pm$ 0.3                     | 987 $\pm$ 71                      |
| U87MG, ATX-101      | 25.0 $\pm$ 0.2                     | 385 $\pm$ 55                      |
| U87MG, RT           | 24.8 $\pm$ 0.5                     | 775 $\pm$ 40                      |
| U87MG, RT + ATX-101 | 24.5 $\pm$ 0.8                     | 166 $\pm$ 24                      |
| T98G, Vehicle       | 24.5 $\pm$ 0.3                     | 1015 $\pm$ 61                     |
| T98G, ATX-101       | 26.0 $\pm$ 0.2                     | 655 $\pm$ 40                      |
| T98G, RT            | 24.8 $\pm$ 0.5                     | 710 $\pm$ 46                      |
| T98G, RT + ATX-101  | 24.5 $\pm$ 0.3                     | 346 $\pm$ 22                      |

**Table S3.** Radio-sensitization of ATX-101 on U87MG and T98G subcutaneous xenografts. Statistical analyses of Kaplan Meyer curves shown in Figure 7.

|                            | U87MG |            |            |                                 | T98G |            |            |                                         |
|----------------------------|-------|------------|------------|---------------------------------|------|------------|------------|-----------------------------------------|
| Comparisons                | HR    | 95% CI     | Statistics | Combina-<br>tion index,<br>CI   | HR   | 95% CI     | Statistics | Combina-<br>tion index,<br>CI           |
| Vehicle vs<br>ATX-101      | 4.3   | 1.5 - 15.4 | p<0.001    | ATX+RT<br>CI=1.05<br>(Additive) | 3.4  | 1.2 - 11.1 | p<0.001    | ATX+RT<br>CI=0.93<br>(sub-<br>additive) |
| Vehicle vs RT              | 2.2   | 1.0 - 6.6  | p<0.05     |                                 | 3.0  | 1.0 - 9.7  | p<0.001    |                                         |
| RT vs<br>ATX-101           | 3.8   | 1.3 - 11.2 | p<0.005    |                                 | 1.5  | 0.6 - 3.9  | NS         |                                         |
| Vehicle vs<br>ATX-101 + RT | 6.8   | 1.9-- 21.1 | p<0.0001   |                                 | 5.9  | 1.4 - 17.7 | p<0.0001   |                                         |
| ATX-101 vs<br>ATX-101 + RT | 3.6   | 1.2 - 9.17 | p<0.01     |                                 | 3.0  | 1.0 - 8.5  | p<0.01     |                                         |
| RT vs<br>ATX-101 + RT      | 4.6   | 1.5 - 14.2 | p<0.001    |                                 | 2.3  | 0.9 - 6.4  | p<0.05     |                                         |

NS= not significant.

**Table S4.** Statistical analyses for disease-free survival (DFS) and overall survival OS (A) and HR ratios (B) for animals treated with ATX-101 with or without RT for the orthotopic brain tumour model using luciferase tagged U87MG cells. Kaplan Meyer curves shown in Figure 8.

(A)

|              | Disease-free survival (DFS) |                  |                                                        | Overall survival (OS) |                  |                                                        |
|--------------|-----------------------------|------------------|--------------------------------------------------------|-----------------------|------------------|--------------------------------------------------------|
| Treatment    | Range (days)                | Mean $\pm$ SEM   | Statistics                                             | Range (days)          | Mean $\pm$ SEM   | Statistics                                             |
| Vehicle      | 15-35                       | 21.5 $\pm$ 2.4   |                                                        | 40-70                 | 56.0 $\pm$ 3.0   |                                                        |
| ATX-101      | 30-120                      | 53.0 $\pm$ 8.8   | p<0.01 vs Vehicle                                      | 80-180                | 102.7 $\pm$ 10.7 | p<0.01 vs Vehicle                                      |
| RT           | 25-40                       | 330 $\pm$ 4.8    | p<0.01 vs Vehicle<br>p<0.05 vs ATX-101                 | 45-90                 | 69.0 $\pm$ 4.0   | p<0.05 vs Vehicle<br>p<0.01 vs ATX-101                 |
| ATX-101 + RT | 50-250                      | 114.5 $\pm$ 24.7 | p<0.01 vs Vehicle<br>p<0.01 vs ATX-101<br>p<0.01 vs RT | 88-250                | 157.3 $\pm$ 22.5 | p<0.01 vs Vehicle<br>p<0.05 vs ATX-101<br>p<0.01 vs RT |

(B)

|                         | Disease-free survival (DFS) |          |            |                               | Overall survival (OS) |          |            |                               |
|-------------------------|-----------------------------|----------|------------|-------------------------------|-----------------------|----------|------------|-------------------------------|
| Comparison              | HR                          | 95% CI   | Statistics | Combination index, CI         | HR                    | 95% CI   | Statistics | Combination index, CI         |
| Vehicle vs ATX-101      | 3.3                         | 1.2-11.4 | p<0.01     | ATX+RT<br>CI=1.02<br>Additive | 4.9                   | 1.5-15.1 | p<0.01     | ATX+RT<br>CI=1.06<br>Additive |
| Vehicle vs RT           | 2.4                         | 0.9-6.3  | p<0.01     |                               | 2.4                   | 1.0-7.0  | p<0.01     |                               |
| RT vs ATX-101           | 2.5                         | 0.9-6.5  | p<0.01     |                               | 3.3                   | 1.2-9.4  | p<0.01     |                               |
| Vehicle vs ATX-101 + RT | 5.5                         | 2.0-13.9 | p<0.01     |                               | 7.7                   | 2.6-16.9 | p<0.01     |                               |
| ATX-101 vs ATX-101 + RT | 4.9                         | 1.5-15.0 | p<0.01     |                               | 4.0                   | 1.4-10.0 | p<0.01     |                               |
| RT vs ATX-101 + RT      | 3.0                         | 1.1-8.3  | p<0.01     |                               | 5.1                   | 1.6-15.6 | p<0.01     |                               |

**Table S5.** Statistical analyses for DFS and OS (A) and HR ratios (B) for animals treated with ATX-101 with or without RT for the orthotopic brain tumour model using luciferase tagged GSGs-5 cells. Kaplan Meyer curves shown in Figure 8.

(A)

| Treatment    | Disease-free survival (DFS) |                  |                                                        | Overall survival (OS) |                  |                                                        |
|--------------|-----------------------------|------------------|--------------------------------------------------------|-----------------------|------------------|--------------------------------------------------------|
|              | Range (days)                | Mean $\pm$ SEM   | Statistics                                             | Range (days)          | Mean $\pm$ SEM   | Statistics                                             |
| Vehicle      | 35-65                       | 46.0 $\pm$ 3.0   |                                                        | 40-70                 | 79.5 $\pm$ 3.6   |                                                        |
| ATX-101      | 60-85                       | 73.5 $\pm$ 2.6   | p<0.001 vs Vehicle                                     | 94-145                | 74.5 $\pm$ 4.6   | NS vs Vehicle                                          |
| RT           | 25-60                       | 37.0 $\pm$ 4.0   | NS vs Vehicle<br>p<0.01 vs ATX-101                     | 45-90                 | 69.0 $\pm$ 4.0   | p<0.05 vs Vehicle<br>p<0.01 vs ATX-101                 |
| ATX-101 + RT | 50-250                      | 117.5 $\pm$ 24.3 | p<0.01 vs Vehicle<br>p<0.01 vs ATX-101<br>p<0.01 vs RT | 88-250                | 170.3 $\pm$ 22.4 | p<0.01 vs Vehicle<br>p<0.01 vs RT<br>p<0.01 vs ATX-101 |

NS= not significant.

(B)

| Comparison              | Disease-free survival (DFS) |          |            |                                   | Overall survival (OS) |            |            |                                  |
|-------------------------|-----------------------------|----------|------------|-----------------------------------|-----------------------|------------|------------|----------------------------------|
|                         | HR                          | 95% CI   | Statistics | Combination index, CI             | HR                    | 95% CI     | Statistics | Combination index, CI            |
| Vehicle vs ATX-101      | 4.0                         | 1.3-11.1 | p<0.01     | ATX+RT<br>CI=0.97<br>Sub-Additive | 4.4                   | 1.4-13.7   | p<0.01     | ATX+RT<br>CI=1.11<br>Synergistic |
| Vehicle vs RT           | 0.6                         | 0.3-1.5  | NS         |                                   | 0.8                   | 0.3-2.0    | NS         |                                  |
| RT vs ATX-101           | 4.2                         | 1.3-16.7 | p<0.01     |                                   | 4.7                   | 1.48-13.57 | p<0.01     |                                  |
| Vehicle vs ATX-101 + RT | 4.5                         | 1.3-11.4 | p<0.01     |                                   | 5.8                   | 1.6-14.9   | p<0.01     |                                  |
| ATX-101 vs ATX-101 + RT | 1.9                         | 0.7-4.9  | NS         |                                   | 2.4                   | 0.9-6.3    | p<0.05     |                                  |
| RT vs ATX-101 + RT      | 3.9                         | 1.3-11.4 | p<0.01     |                                   | 4.5                   | 1.5-13.6   | p<0.01     |                                  |

NS= not significant.
